# Supplementary material for: g-C3N4-modified Zr-Fc MOFs as a novel photocatalysis-self-Fenton system toward the direct hydroxylation of benzene to phenol
Source: Royal Society of Chemistry journal article supplement (doi:10.1039/d3ra03055e), 2023-01-01
Supplement: d3ra03055e1.pdf [file d3ra03055e1.pdf]

## Supporting Information

### **g-C<sub>3</sub>N<sub>4</sub> Modified Zr-Fc MOFs as a Novel Photocatalysis-self-Fenton System towards Direct Hydroxylation of Benzene to Phenol**

**Xu Jia <sup>1</sup>, Cong Liu <sup>1</sup>, Xuotong Xu <sup>1</sup>, Fuying Wang <sup>1</sup>, Weiwei Li <sup>1</sup>,  
Liuxue Zhang<sup>\*1</sup>, Shuyan Jiao <sup>\*1</sup>, Genxing Zhu <sup>1</sup>, Xiulian Wang <sup>2</sup>**

<sup>1</sup> School of Materials and Chemical Engineering, Zhongyuan University of Technology, Zhengzhou, 450007, PR China

<sup>2</sup> School of Energy and Environment, Zhongyuan University of Technology, Zhengzhou, 450007, PR China

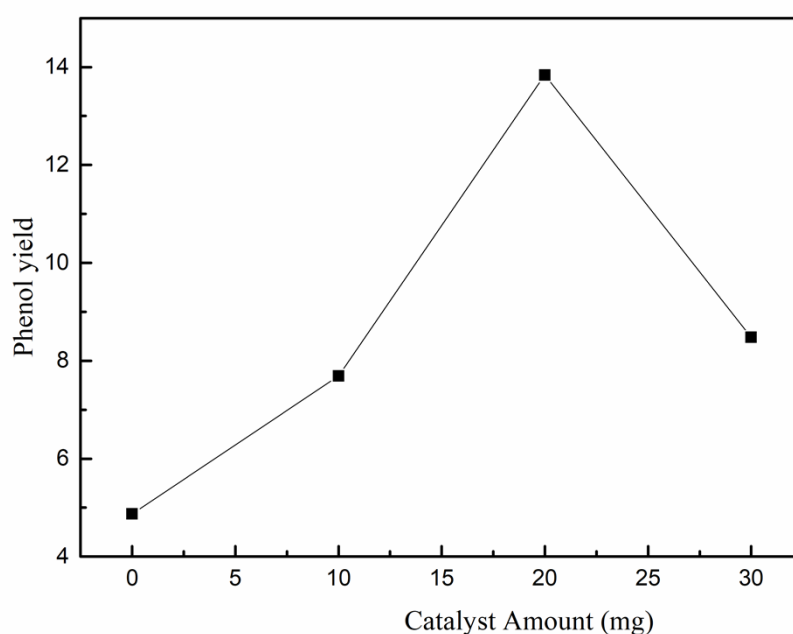

Fig. S1 Effect of the catalyst dosage on the direct hydroxylation of benzene

---

<sup>1</sup> Corresponding author. Email address: [zhanglx@zut.edu.cn](mailto:zhanglx@zut.edu.cn) (Liuxue Zhang);  
[jiaosy@zut.edu.cn](mailto:jiaosy@zut.edu.cn) (Shuyan Jiao).  
Tel.: +86-731-62506699; Fax: +86-731-62506095

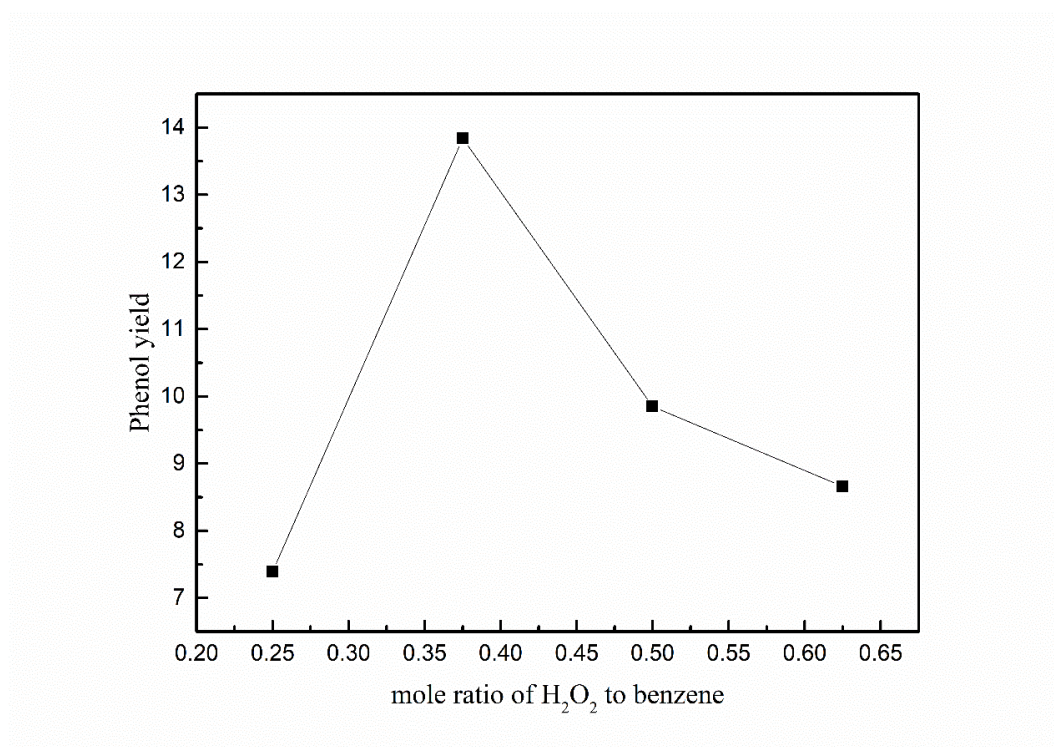

Fig. S2 Effect of the amount of  $\text{H}_2\text{O}_2$  on the direct hydroxylation of benzene

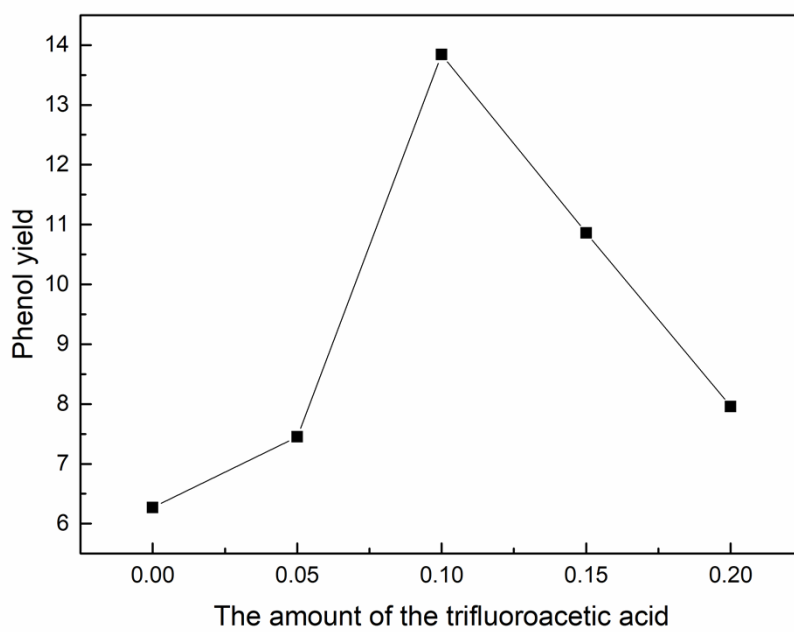

Fig. S3 Effect of the amount of trifluoroacetic acid on the catalytic hydroxylation of benzene to phenol

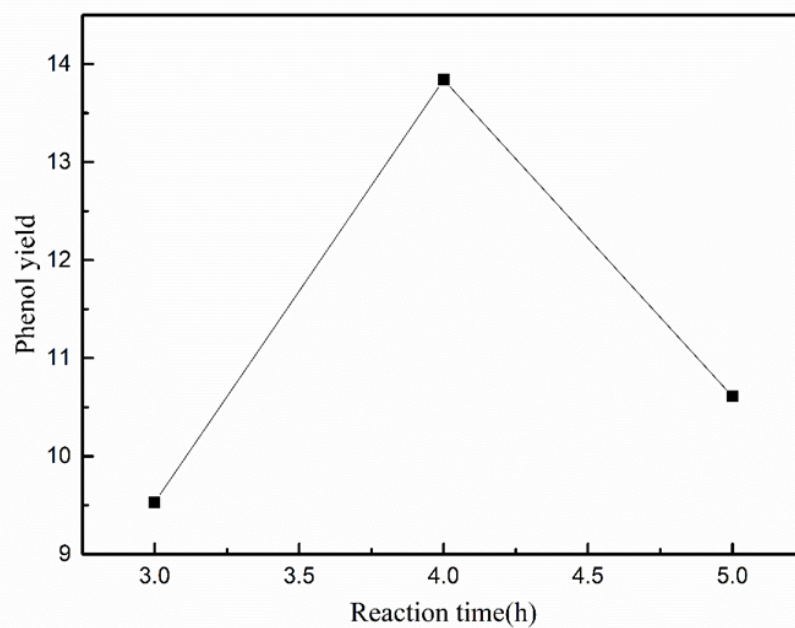

Fig. S4 Effect of the reaction time on the catalytic hydroxylation of benzene to phenol

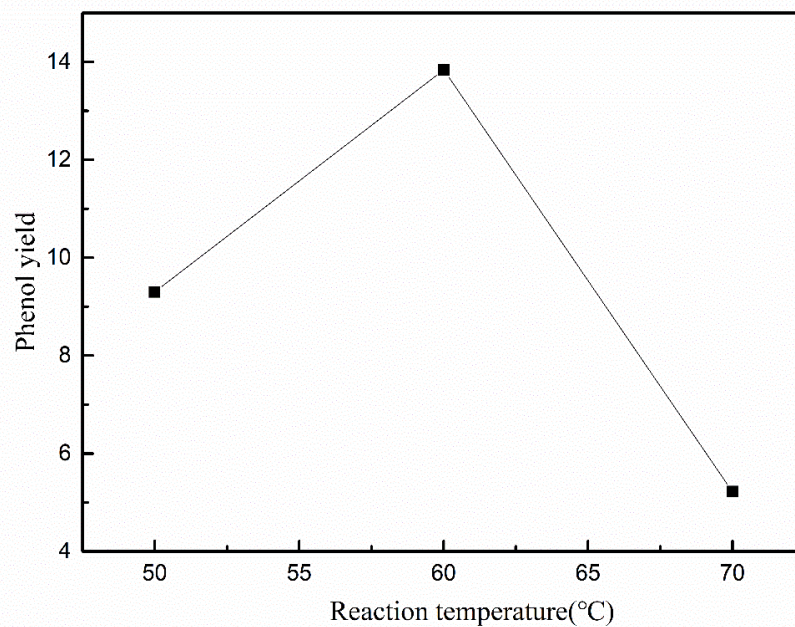

Fig. S5 Effect of the reaction temperature on the catalytic hydroxylation of benzene to phenol

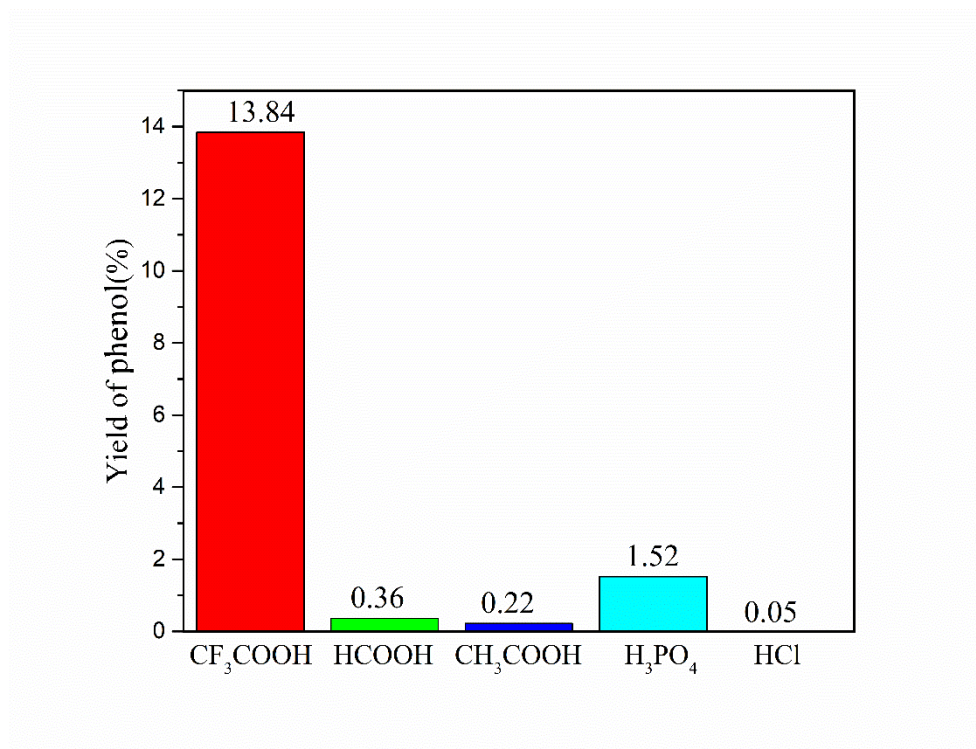

Reaction condition: catalyst (1.5mg/mL), benzene (1.6 mL, 18.05 mmol),  $\text{H}_2\text{O}_2$  (30 wt. %) (0.6 mL), solvent: (acetonitrile: 11 mL), acid (0.88 mmol),  $t=4$  h and  $T=333$  K

Fig. S6 Effect of acid on the catalytic benzene hydroxylation

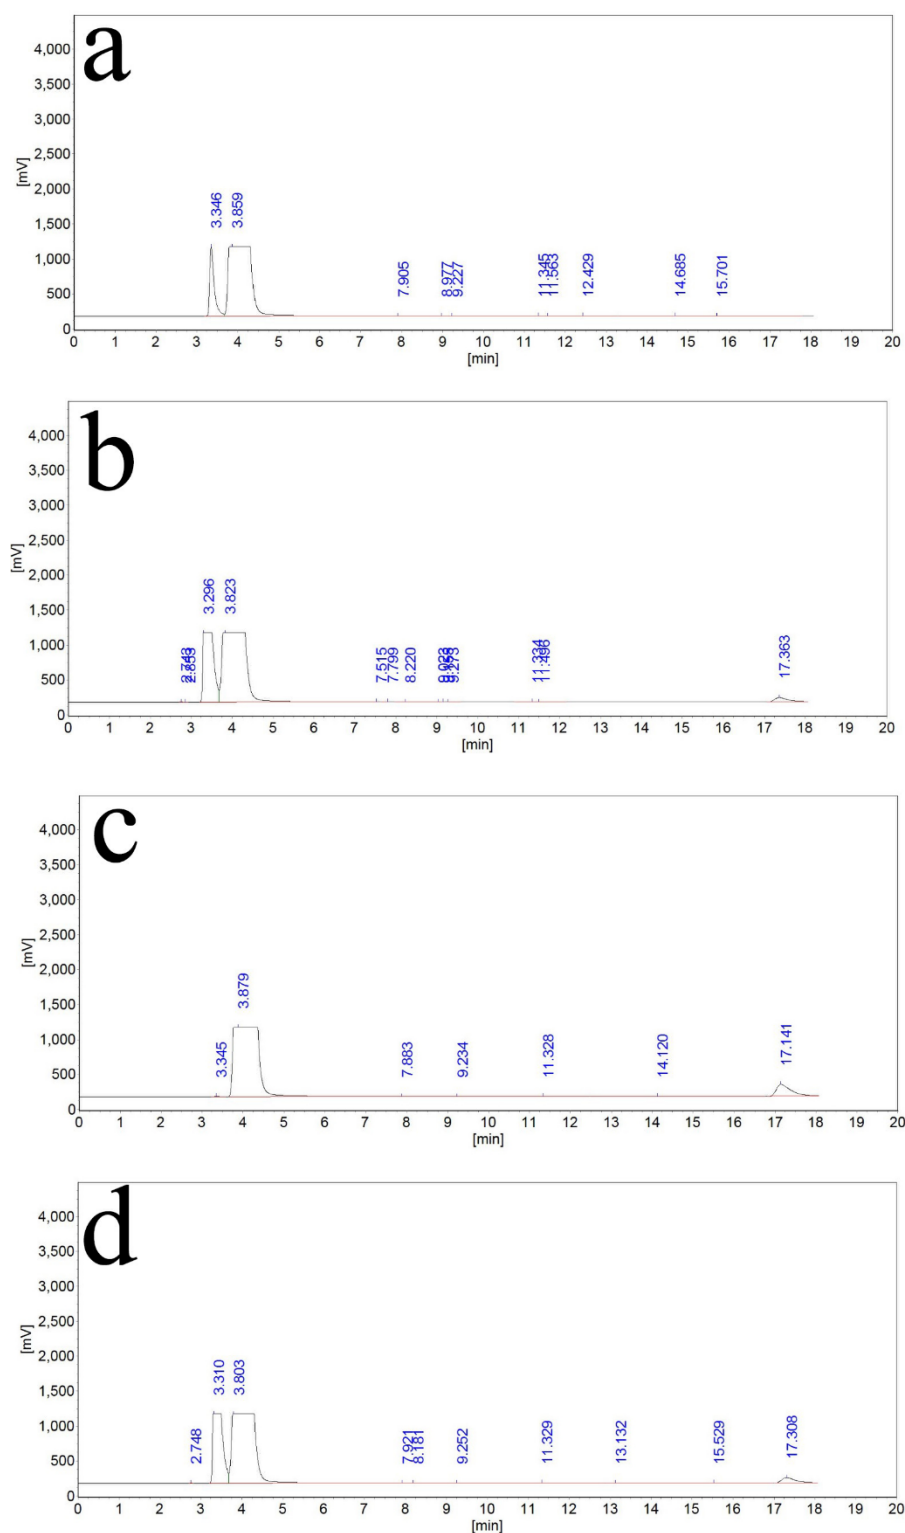

Fig. S7 The gas chromatograms of the pre-reaction system (a), the post-reaction system (b), phenol (c) and the mixture of post-reaction system and phenol (d).
